# Supplementary material
Source: publisher site journal article supplement (https://www.spandidos-publications.com/6816/downloadSupplementary)
Supplement: Supplementary file 1 [file downloadSupplementary]

Table SI. Mean wound area(mm<sup>2</sup>).

| Treatment  | Time, days |            |            |            |          |          |
|------------|------------|------------|------------|------------|----------|----------|
|            | 0          | 3          | 6          | 9          | 18       | 32       |
| PI         | 307.2±16.3 | 231.9±8.6  | 179.4±6.0  | 134.3±7.2  | 17.9±3.4 | 10.5±1.0 |
| SES-low    | 332.1±10.9 | 228.6±5.1  | 157.9±4.7  | 111.9±3.5  | 10.6±1.0 | 5.9±0.7  |
| SES-low+G  | 344.8±9.5  | 176.8±3.6  | 128.8±2.3  | 95.1±1.5   | 6.5±1.9  | 4.8±0.6  |
| SES-high   | 307.9±14.1 | 243.9±10.1 | 153.3±7.4  | 105.1±5.7  | 20.2±2.4 | 9.8±1.5  |
| SES-high+G | 329.2±10.1 | 222.2±8.3  | 134.1±7.9  | 145.3±6.3  | 23.8±3.2 | 11.9±0.3 |
| NF         | 341.3±7.2  | 137.3±5.2  | 142.6±9.3  | 109.8±10.6 | 10.9±1.5 | 6.0±0.7  |
| S          | 336.3±7.9  | 187.2±6.9  | 186.5±12.0 | 123.9±8.5  | 19.1±3.4 | 6.9±1.0  |

PI, placebo;SES: super electrolyzed solution, ; , NF: nitrofurazone, S: silver sulfadiazine; G, gel.

Table SII. Mean wound closure (%).

| Comparison                      | Mean difference | 95% CI           | Adjusted P-value |
|---------------------------------|-----------------|------------------|------------------|
| Pl vs. SES-low, day 3           | -6.66           | -16.53 to 3.20   | 0.7770           |
| Pl vs. SES-low + G, day 3       | -24.20          | -33.50 to -14.90 | <0.0001          |
| Pl vs. SES-high, day 3          | 3.73            | -5.57 to 13.04   | >0.9999          |
| Pl vs. SES-high + G, day 3      | -7.96           | -17.27 to 1.34   | 0.2486           |
| Pl vs. NF, day 3                | -35.25          | -44.56 to -25.95 | <0.0001          |
| Pl vs. S, day 3                 | -19.83          | -29.70 to -9.96  | <0.0001          |
| Pl vs. SES-low, day 6           | -10.85          | -20.72 to -0.98  | 0.0124           |
| Pl vs. SES-low + G, day 6       | -21.04          | -30.35 to -11.74 | <0.0001          |
| Pl vs. SES-high, day 6          | -8.62           | -17.93 to 0.68   | 0.1208           |
| Pl vs. SES-high + G, day 6      | -17.67          | -26.98 to -8.37  | <0.0001          |
| Pl vs. NF, day 6                | -16.61          | -25.91 to -7.30  | <0.0001          |
| Pl vs. S, day 6                 | -2.96           | -12.83 to 6.90   | >0.9999          |
| Pl vs. SES-low, day 9           | -10.02          | -19.88 to -0.15  | 0.0410           |
| Pl vs. SES-low + G, day 9       | -16.13          | -26.53 to -5.73  | <0.0001          |
| Pl vs. SES-high, day 9          | -9.57           | -19.43 to 0.30   | 0.0734           |
| Pl vs. SES-high + G, day 9      | 0.43            | -9.44 to 10.30   | >0.9999          |
| Pl vs. NF, day 9                | -11.52          | -21.39 to -1.65  | 0.0043           |
| Pl vs. S, day 9                 | -6.86           | -16.72 to 3.01   | 0.7229           |
| Pl vs. SES-low, day 18          | -2.63           | -11.93 to 6.68   | >0.9999          |
| Pl vs. SES-low + G, day 18      | -3.92           | -13.22 to 5.39   | 0.9998           |
| Pl vs. SES-high, day 18         | 0.75            | -8.56 to 10.05   | >0.9999          |
| Pl vs. SES-high + G, day 18     | 1.42            | -8.45 to 11.29   | >0.9999          |
| Pl vs. NF, day 18               | -2.63           | -11.93 to 6.68   | >0.9999          |
| Pl vs. S, day 18                | -0.14           | -9.44 to 9.16    | >0.9999          |
| Pl vs. SES-low, day 32          | -1.64           | -10.95 to 7.66   | >0.9999          |
| Pl vs. SES-low + G, day 32      | -2.02           | -11.33 to 7.28   | >0.9999          |
| Pl vs. SES-high, day 32         | -0.24           | -9.55 to 9.06    | >0.9999          |
| Pl vs. SES-high + G, day 32     | 0.20            | -9.67 to 10.07   | >0.9999          |
| Pl vs. NF, day 32               | -1.67           | -10.97 to 7.64   | >0.9999          |
| Pl vs. S, day 32                | -1.37           | -10.68 to 7.93   | >0.9999          |
| SES-low vs. SES-low + G, day 3  | -18.00          | -38.46 to -18.72 | <0.0001          |
| SES-low vs. SES-high, day 3     | 10.40           | 0.53 to 20.27    | 0.0242           |
| SES-low vs. SES-high + G, day 3 | -1.30           | -11.17 to 8.57   | >0.9999          |
| SES-low vs. NF, day 3           | -28.59          | -38.46 to -18.72 | <0.0001          |
| SES-low vs. S, day 3            | -13.16          | -23.57 to -2.76  | 0.0008           |
| SES-low vs. SES-low + G, day 6  | -10.19          | -20.06 to -0.32  | 0.0323           |
| SES-low vs. SES-high, day 6     | 2.23            | -7.64 to 12.10   | >0.9999          |
| SES-low vs. SES-high + G, day 6 | -6.82           | -16.69 to 3.05   | 0.7326           |
| SES-low vs. NF, day 6           | -5.76           | -15.62 to 4.11   | 0.9489           |

|                                      |        |                  |         |
|--------------------------------------|--------|------------------|---------|
| SES-low vs. S, day 6                 | 7.89   | -2.52 to 18.29   | 0.5250  |
| SES-low vs. SES-low + G, day 9       | -6.11  | -15.98 to 3.76   | 0.8998  |
| SES-low vs. SES-high, day 9          | 0.45   | -8.85 to 9.76    | >0.9999 |
| SES-low vs. SES-high + G, day 9      | 10.45  | 1.15 to 19.75    | 0.0087  |
| SES-low vs. NF, day 9                | -1.50  | -10.80 to 7.80   | >0.9999 |
| SES-low vs. S, day 9                 | 3.16   | -6.14 to 12.46   | >0.9999 |
| SES-low vs. SES-low + G, day 18      | -1.29  | -10.60 to 8.01   | >0.9999 |
| SES-low vs. SES-high, day 18         | 3.37   | -5.93 to 12.68   | >0.9999 |
| SES-low vs. SES-high + G, day 18     | 4.05   | -5.82 to 13.91   | 0.9999  |
| SES-low vs. NF, day 18               | -0.00  | -9.31 to 9.30    | >0.9999 |
| SES-low vs. S, day 18                | 2.49   | -6.82 to 11.79   | >0.9999 |
| SES-low vs. SES-low + G, day 32      | -0.38  | -9.69 to 8.92    | >0.9999 |
| SES-low vs. SES-high, day 32         | 1.40   | -7.91 to 10.70   | >0.9999 |
| SES-low vs. SES-high + G, day 32     | 1.84   | -8.03 to 11.71   | >0.9999 |
| SES-low vs. NF, day 32               | -0.03  | -9.33 to 9.28    | >0.9999 |
| SES-low vs. S, day 32                | 0.27   | -9.03 to 9.57    | >0.9999 |
| SES-low + G, vs. SES-high, day 3     | 27.93  | 18.63 to 37.24   | <0.0001 |
| SES-low + G vs. SES-high + G, day 3  | 16.24  | 6.93 to 25.54    | <0.0001 |
| SES-low + G vs. NF, day 3            | -11.05 | -20.36 to -1.75  | 0.0031  |
| SES-low + G vs. S, day 3             | 4.37   | -5.50 to 14.24   | 0.9993  |
| SES-low + G vs. SES-high, day 6      | 12.42  | 3.12 to 21.72    | 0.0002  |
| SES-low + G vs. SES-high + G, day 6  | 3.37   | -5.93 to 12.67   | >0.9999 |
| SES-low + G vs. NF, day 6            | 4.44   | -4.87 to 13.74   | 0.9974  |
| SES-low + G vs. S, day 6             | 18.08  | 8.21 to 27.95    | <0.0001 |
| SES-low + G vs. SES-high, day 9      | 6.56   | -3.31 to 16.43   | 0.8036  |
| SES-low + G vs. SES-high + G, day 9  | 16.56  | 6.69 to 26.43    | <0.0001 |
| SES-low + G vs. NF, day 9            | 4.61   | -5.26 to 14.48   | 0.9982  |
| SES-low + G vs. S, day 9             | 9.27   | -0.60 to 19.14   | 0.1044  |
| SES-low + G vs. SES-high, day 18     | 4.67   | -4.64 to 13.97   | 0.9939  |
| SES-low + G vs. SES-high + G, day 18 | 5.34   | -4.53 to 15.21   | 0.9809  |
| SES-low + G vs. NF, day 18           | 1.29   | -8.01 to 10.59   | >0.9999 |
| SES-low + G vs. S, day 18            | 3.78   | -5.52 to 13.08   | 0.9999  |
| SES-low + G vs. SES-high, day 32     | 1.78   | -7.52 to 11.08   | >0.9999 |
| SES-low + G vs. SES-high + G, day 32 | 2.23   | -7.64 to 12.09   | >0.9999 |
| SES-low + G vs. NF, day 32           | 0.36   | -8.95 to 9.66    | >0.9999 |
| SES-low + G vs. S, day 32            | 0.65   | -8.65 to 9.96    | >0.9999 |
| SES-high vs. SES-high + G, day 3     | -11.69 | -21.00 to -2.39  | 0.0009  |
| SES-high 3 vs. NF, day 3             | -38.99 | -48.29 to -29.68 | <0.0001 |
| SES-high vs. S, day 3                | -23.56 | -33.43 to -13.69 | <0.0001 |
| SES-high vs. SES-high + G, day 6     | -9.05  | -18.35 to 0.25   | 0.0705  |
| SES-high vs. NF, day 6               | -7.98  | -17.29 to 1.32   | 0.2434  |
| SES-high vs. S, day 6                | 5.66   | -4.21 to 15.53   | 0.9586  |
| SES-high vs. SES-high + G, day 9     | 10.00  | 0.69 to 19.30    | 0.0179  |

|                                   |        |                  |         |
|-----------------------------------|--------|------------------|---------|
| SES-high vs. NF, day 9            | -1.95  | -11.26 to 7.35   | >0.9999 |
| SES-high vs. S, day 9             | 2.71   | -6.59 to 12.01   | >0.9999 |
| SES-high vs. SES-high + G, day 18 | 0.67   | -9.20 to 10.54   | >0.9999 |
| SES-high vs. NF, day 18           | -3.38  | -12.68 to 5.93   | >0.9999 |
| SES-high vs. S, day 18            | -0.89  | -10.19 to 8.42   | >0.9999 |
| SES-high vs. SES-high + G, day 32 | 0.44   | -9.42 to 10.31   | >0.9999 |
| SES-high vs. NF, day 32           | -1.42  | -10.73 to 7.88   | >0.9999 |
| SES-high vs. S, day 32            | -1.13  | -10.43 to 8.18   | >0.9999 |
| SES-high + G vs. NF, day 3        | -27.29 | -36.59 to -17.99 | <0.0001 |
| SES-high + G vs. S, day 3         | -11.87 | -21.73 to -2.00  | 0.0024  |
| SES-high + G vs. NF, day 6        | 1.07   | -8.24 to 10.37   | >0.9999 |
| SES-high + G vs. S, day 6         | 14.71  | 4.84 to 24.58    | <0.0001 |
| SES-high + G vs. NF, day 9        | -11.95 | -21.25 to -2.65  | 0.0006  |
| SES-high + G vs. S, day 9         | -7.29  | -16.59 to 2.02   | 0.4454  |
| SES-high + G vs. NF, day 18       | -4.05  | -13.92 to 5.82   | 0.9999  |
| SES-high + G vs. S, day 18        | -1.56  | -11.43 to 8.31   | >0.9999 |
| SES-high + G vs. NF, day 32       | -1.87  | -11.74 to 8.00   | >0.9999 |
| SES-high + G vs. S, day 32        | -1.57  | -11.44 to 8.30   | >0.9999 |
| NF vs. S, day 3                   | 15.42  | 5.56 to 25.29    | <0.0001 |
| NF vs. S, day 6                   | 13.64  | 3.77 to 23.51    | <0.0001 |
| NF vs. S, day 9                   | 4.66   | -4.64 to 13.97   | 0.9940  |
| NF vs. S, day 18                  | 2.49   | -6.82 to 11.79   | >0.9999 |
| NF, day 32 vs. S, day 32          | 0.29   | -9.01 to 9.60    | >0.9999 |

PI: placebo; SES: superoxidized electrolyzed solution, G: gel, NF: nitrofurazone, S: silver sulfadiazine.

Table SIII. Polymorphonuclear cell count.

| Treatment    | Time, days |          |          |         |
|--------------|------------|----------|----------|---------|
|              | 6          | 9        | 18       | 32      |
| Pl           | 5.1±1.0    | 15.5±2.2 | 6.0±1.2  | 3.2±0.4 |
| SES-low      | 4.7±0.7    | 6.8±0.6  | 6.0±0.6  | 3.0±0.5 |
| SES-low + G  | 6.3±0.8    | 10.7±1.0 | 8.6±1.2  | 3.5±0.3 |
| SES-high     | 6.1±0.8    | 14.9±1.7 | 10.1±1.3 | 4.8±0.4 |
| SES-high + G | 9.6± 2.0   | 16.4±1.6 | 5.9±0.5  | 3.6±0.3 |
| NF           | 10.3±0.9   | 16.9±1.6 | 4.1±0.5  | 3.2±0.3 |
| S            | 10.8±1.2   | 14.5±2.2 | 7.6±1.1  | 6.6±0.4 |

Pl, placebo;SES: superoxidized electrolyzed solution, G: gel,NF: nitrofurazone, S: silver sulfadiazine.

Table SIV. Monocyte count.

| Treatment    | Time, days |           |          |          |
|--------------|------------|-----------|----------|----------|
|              | 6          | 9         | 18       | 32       |
| PI           | 21.8±5.0   | 95.4±8.2  | 40.2±4.9 | 17.3±2.2 |
| SES-low      | 24.6±4.3   | 56.6±6.2  | 29.8±3.8 | 13.5±1.5 |
| SES-low + G  | 26.8±4.4   | 66.4±6.6  | 30.2±2.5 | 14.5±1.1 |
| SES-high     | 27.5±3.2   | 98.5±7.8  | 33.1±2.8 | 18.3±0.9 |
| SES-high + G | 41.0±7.7   | 101.1±5.0 | 32.5±2.3 | 20.6±2.0 |
| NF           | 60.8±7.1   | 114.6±7.0 | 43.3±3.4 | 18.3±1.2 |
| S            | 82.1±9.3   | 117.5±5.8 | 33.1±4.6 | 26.4±2.3 |

PI, placebo, SES: superoxidized electrolyzed solution, G: gel, NF: nitrofurazone; S: silver sulfadiazine.

Table SV. Mean inflammatory infiltrate.

| Comparison                       | Mean difference | 95% CI            | Adjusted P-value |
|----------------------------------|-----------------|-------------------|------------------|
| Pl vs. SES-low, day 6            | -3.28           | -32.03 to 25.48   | 0.9998           |
| Pl vs. SES-low + G, day 6        | -7.00           | -35.76 to 21.76   | 0.9872           |
| Pl vs. SES-high, day 6           | -9.75           | -38.51 to 19.01   | 0.9355           |
| Pl vs. SES-high + G, day 6       | -28.22          | -56.98 to 0.53    | 0.0572           |
| Pl vs. NF, day 6                 | -46.72          | -75.48 to -17.97  | 0.0002           |
| Pl vs. S, day 6                  | -66.81          | -95.56 to -38.05  | <0.0001          |
| Pl vs. SES-low, day 9            | 48.47           | 18.07 to 78.87    | 0.0003           |
| Pl vs. SES-low + G, day 9        | 34.67           | 4.27 to 65.07     | 0.0169           |
| Pl vs. SES-high, day 9           | -9.14           | -39.54 to 21.26   | 0.9632           |
| Pl vs. SES-high + G, day 9       | -8.19           | -38.60 to 22.21   | 0.9785           |
| Pl vs. NF, day 9                 | -19.75          | -50.15 to 10.65   | 0.4145           |
| Pl vs. S, day 9                  | -23.00          | -53.40 to 7.40    | 0.2436           |
| Pl vs. SES-low, day 18           | 9.86            | -7.59 to 27.32    | 0.5785           |
| Pl vs. SES-low + G, day 18       | 7.03            | -10.43 to 24.48   | 0.8657           |
| Pl vs. SES-high, day 18          | 2.44            | -15.01 to 19.90   | 0.9994           |
| Pl vs. SES-high + G, day 18      | 7.44            | -10.01 to 24.90   | 0.8317           |
| Pl vs. NF, day 18                | -1.50           | -18.95 to 15.95   | >0.9999          |
| Pl vs. S, day 18                 | 5.19            | -12.26 to 22.65   | 0.9649           |
| Pl vs. SES-low, day 32           | 3.89            | -4.68 to 12.45    | 0.7879           |
| Pl vs. SES-low + G, day 32       | 2.42            | -6.15 to 10.98    | 0.9730           |
| Pl vs. SES-high, day 32          | -2.64           | -11.20 to 5.93    | 0.9586           |
| Pl vs. SES-high + G, day 32      | -3.69           | -12.26 to 4.87    | 0.8244           |
| Pl vs. NF, day 32                | -1.11           | -9.68 to 7.45     | 0.9996           |
| Pl vs. S, day 32                 | -12.67          | -21.23 to -4.10   | 0.0009           |
| SES-low vs. SES-low + G, day 6   | -3.72           | -32.48 to 25.03   | 0.9996           |
| SES-low vs. SES-high, day 6      | -6.47           | -35.23 to 22.28   | 0.9915           |
| SES-low vs. SES-high + G, day 6  | -24.94          | -53.70 to 3.81    | 0.1252           |
| SES-low vs. NF, day 6            | -43.44          | -72.20 to -14.69  | 0.0007           |
| SES-low vs. S, day 6             | -63.53          | -92.28 to -34.77  | <0.0001          |
| SES-low vs. SES-low + G, day 9   | -13.81          | -44.21 to 16.60   | 0.7877           |
| SES-low vs. SES-high, day 9      | -57.61          | -88.01 to -27.21  | <0.0001          |
| SES-low vs. SES-high + G, day 9  | -56.67          | -87.07 to -26.27  | <0.0001          |
| SES-low vs. NF, day 9            | -68.22          | -98.62 to -37.82  | <0.0001          |
| SES-low vs. S, day 9             | -71.47          | -101.90 to -41.07 | <0.0001          |
| SES-low vs. SES-low + G, day 18  | -2.83           | -20.29 to 14.62   | 0.9986           |
| SES-low vs. SES-high, day 18     | -7.42           | -24.87 to 10.04   | 0.8341           |
| SES-low vs. SES-high + G, day 18 | -2.42           | -19.87 to 15.04   | 0.9994           |
| SES-low vs. NF, day 18           | -11.36          | -28.82 to 6.09    | 0.4122           |
| SES-low vs. S, day 18            | -4.67           | -22.12 to 12.79   | 0.9793           |

|                                      |        |                  |         |
|--------------------------------------|--------|------------------|---------|
| SES-low vs. SES-low + G, day 32      | -1.47  | -10.04 to 7.09   | 0.9980  |
| SES-low vs. SES-high, day 32         | -6.53  | -15.09 to 2.04   | 0.2362  |
| SES-low vs. SES-high + G, day 32     | -7.58  | -16.15 to 0.98   | 0.1115  |
| SES-low vs. NF, day 32               | -5.00  | -13.57 to 3.57   | 0.5411  |
| SES-low vs. S, day 32                | -16.56 | -25.12 to -7.99  | <0.0001 |
| SES-low + G vs. SES-high, day 6      | -2.75  | -31.51 to 26.01  | >0.9999 |
| SES-low + G vs. SES-high + G, day 6  | -21.22 | -49.98 to 7.53   | 0.2693  |
| SES-low + G vs. NF, day 6            | -39.72 | -68.48 to -10.97 | 0.0022  |
| SES-low + G vs. S, day 6             | -59.81 | -88.56 to -31.05 | <0.0001 |
| SES-low + G vs. SES-high, day 9      | -43.81 | -74.21 to -13.40 | 0.0013  |
| SES-low + G vs. SES-high + G, day 9  | -42.86 | -73.26 to -12.46 | 0.0017  |
| SES-low + G vs. NF, day 9            | -54.42 | -84.82 to -24.02 | <0.0001 |
| SES-low + G vs. S, day 9             | -57.67 | -88.07 to -27.27 | <0.0001 |
| SES-low + G vs. SES-high, day 18     | -4.58  | -22.04 to 12.87  | 0.9811  |
| SES-low + G vs. SES-high + G, day 18 | 0.42   | -17.04 to 17.87  | >0.9999 |
| SES-low + G vs. NF, day 18           | -8.53  | -25.98 to 8.93   | 0.7270  |
| SES-low + G vs. S, day 18            | -1.83  | -19.29 to 15.62  | 0.9999  |
| SES-low + G vs. SES-high, day 32     | -5.06  | -13.62 to 3.51   | 0.5283  |
| SES-low + G vs. SES-high + G, day 32 | -6.11  | -14.68 to 2.45   | 0.3060  |
| SES-low + G vs. NF, day 32           | -3.53  | -12.09 to 5.04   | 0.8530  |
| SES-low + G vs. S, day 32            | -15.08 | -23.65 to -6.52  | <0.0001 |
| SES-high vs. SES-high + G, day 6     | -18.47 | -47.23 to 10.28  | 0.4278  |
| SES-high vs. NF, day 6               | -36.97 | -65.73 to -8.22  | 0.0050  |
| SES-high vs. S, day 6                | -57.06 | -85.81 to -28.30 | <0.0001 |
| SES-high vs. SES-high + G, day 9     | 0.94   | -29.46 to 31.35  | >0.9999 |
| SES-high vs. NF, day 9               | -10.61 | -41.01 to 19.79  | 0.9266  |
| SES-high vs. S, day 9                | -13.86 | -44.26 to 16.54  | 0.7847  |
| SES-high vs. SES-high + G, day 18    | 5.00   | -12.45 to 22.45  | 0.9709  |
| SES-high vs. NF, day 18              | -3.94  | -21.40 to 13.51  | 0.9913  |
| SES-high vs. S, day 18               | 2.75   | -14.70 to 20.20  | 0.9988  |
| SES-high vs. SES-high + G, day 32    | -1.06  | -9.62 to 7.51    | 0.9997  |
| SES-high vs. NF, day 32              | 1.53   | -7.04 to 10.09   | 0.9976  |
| SES-high vs. S, day 32               | -10.03 | -18.59 to -1.46  | 0.0132  |
| SES-high + G vs. NF, day 6           | -18.50 | -47.26 to 10.26  | 0.4261  |
| SES-high + G vs. S, day 6            | -38.58 | -67.34 to -9.83  | 0.0031  |
| SES-high + G vs. NF, day 9           | -11.56 | -41.96 to 18.85  | 0.8939  |
| SES-high + G vs. S, day 9            | -14.81 | -45.21 to 15.60  | 0.7299  |
| SES-high + G vs. NF, day 18          | -8.94  | -26.40 to 8.51   | 0.6820  |
| SES-high + G vs. S, day 18           | -2.25  | -19.70 to 15.20  | 0.9996  |
| SES-high + G vs. NF, day 32          | 2.58   | -5.98 to 11.15   | 0.9626  |
| SES-high + G vs. S, day 32           | -8.97  | -17.54 to -0.41  | 0.0350  |
| NF vs. S, day 6                      | -20.08 | -48.84 to 8.67   | 0.3300  |
| NF vs. S, day 9                      | -3.25  | -33.65 to 27.15  | 0.9999  |

|                  |        |                 |        |
|------------------|--------|-----------------|--------|
| NF vs. S, day 18 | 6.69   | -10.76 to 24.15 | 0.8899 |
| NF vs. S, day 32 | -11.56 | -20.12 to -2.99 | 0.0029 |

---

Pl, placebo, SES: superoxidized electrolyzed solution, G: gel, NF: nitrofurazone; S: silver sulfadiazine.

Table SVI. Histology analysis of early collagen with Masson staining.

| A, Day 6     |            |                     |                    |                     |                     |                     |                     |                     |
|--------------|------------|---------------------|--------------------|---------------------|---------------------|---------------------|---------------------|---------------------|
| Group        | Mean score | PI                  | SES-low            | SES-low + G         | SES-high            | SES-high + G        | NF                  | S                   |
| PI           | 3.0±0.0    | -                   | >0.999             | >0.999              | >0.999              | >0.999              | 0.001 <sup>c</sup>  | 0.061               |
| SES-low      | 3.0±0.0    | >0.999              | -                  | >0.999              | >0.999              | >0.999              | 0.001 <sup>c</sup>  | 0.061               |
| SES-low + G  | 3.0±0.0    | >0.999              | >0.999             | -                   | >0.999              | >0.999              | 0.001 <sup>c</sup>  | 0.061               |
| SES-high     | 3.0±0.0    | >0.999              | >0.999             | >0.999              | -                   | >0.999              | 0.001 <sup>c</sup>  | 0.061               |
| SES-high + G | 3.0±0.0    | >0.999              | >0.999             | >0.999              | >0.999              | -                   | 0.001 <sup>c</sup>  | 0.061               |
| NF           | 3.6±0.1    | 0.001 <sup>c</sup>  | 0.001 <sup>c</sup> | 0.001 <sup>c</sup>  | 0.001 <sup>c</sup>  | 0.001 <sup>c</sup>  | -                   | 0.126               |
| S            | 3.3±0.12   | 0.061               | 0.061              | 0.061               | 0.061               | 0.061               | 0.126               | -                   |
| B, Day 9     |            |                     |                    |                     |                     |                     |                     |                     |
| Group        | Mean score | PI                  | SES-low            | SES-low + G         | SES-high            | SES-high + G        | NF                  | S                   |
| PI           | 3.3±0.1    | -                   | 0.011 <sup>a</sup> | >0.999              | >0.999              | >0.999              | 0.001 <sup>c</sup>  | 0.001 <sup>c</sup>  |
| SES-low      | 2.8±0.1    | 0.011 <sup>a</sup>  | -                  | >0.999              | >0.999              | >0.999              | 0.562               | >0.999              |
| SES-low + G  | 3.0±0.0    | >0.999              | >0.999             | -                   | >0.999              | >0.999              | 0.006 <sup>b</sup>  | 0.011 <sup>a</sup>  |
| SES-high     | 3.0±0.0    | >0.999              | >0.999             | >0.999              | -                   | >0.999              | 0.006 <sup>b</sup>  | 0.011 <sup>a</sup>  |
| SES-high + G | 3.0±0.0    | >0.999              | >0.999             | >0.999              | >0.999              | -                   | 0.006 <sup>b</sup>  | 0.011 <sup>a</sup>  |
| NF           | 2.5±0.1    | 0.001 <sup>c</sup>  | 0.562              | 0.006 <sup>b</sup>  | 0.006 <sup>b</sup>  | 0.006 <sup>b</sup>  | -                   | >0.999              |
| S            | 2.6±0.2    | 0.001 <sup>c</sup>  | >0.999             | 0.011 <sup>a</sup>  | 0.011 <sup>a</sup>  | 0.011 <sup>a</sup>  | >0.999              | -                   |
| C, Day 18    |            |                     |                    |                     |                     |                     |                     |                     |
| Group        | Mean score | PI                  | SES-low            | SES-low + G         | SES-high            | SES-high + G        | NF                  | S                   |
| PI           | 2.5±0.1    | -                   | 0.001 <sup>c</sup> | 0.001 <sup>c</sup>  | 0.001 <sup>c</sup>  | 0.001 <sup>c</sup>  | 0.001 <sup>c</sup>  | 0.001 <sup>c</sup>  |
| SES-low      | 3.0±0.1    | 0.001 <sup>c</sup>  | -                  | >0.999              | >0.999              | >0.999              | >0.999              | >0.999              |
| SES-low + G  | 3.0±0.0    | 0.001 <sup>c</sup>  | >0.999             | -                   | 0.356               | >0.999              | >0.999              | >0.999              |
| SES-high     | 2.8±0.1    | 0.001 <sup>c</sup>  | >0.999             | 0.356               | -                   | 0.356               | 0.356               | 0.356               |
| SES-high + G | 3.0±0.0    | 0.001 <sup>c</sup>  | >0.999             | >0.999              | 0.356               | -                   | >0.999              | >0.999              |
| NF           | 3.0±0.0    | 0.001 <sup>c</sup>  | >0.999             | >0.999              | 0.356               | >0.999              | -                   | >0.999              |
| S            | 3.0±0.0    | 0.001 <sup>c</sup>  | >0.999             | >0.999              | 0.356               | >0.999              | >0.999              | -                   |
| D, Day 32    |            |                     |                    |                     |                     |                     |                     |                     |
| Group        | Mean score | PI                  | SES-low            | SES-low + G         | SES-high            | SES-high + G        | NF                  | S                   |
| PI           | 2.5±0.0    | -                   | 0.000 <sup>c</sup> | <0.000 <sup>d</sup> | 0.162               | >0.999              | <0.001 <sup>d</sup> | 0.632               |
| SES-low      | 3.2±0.1    | 0.000 <sup>c</sup>  | -                  | >0.999              | >0.999              | 0.121               | 0.019 <sup>a</sup>  | 0.216               |
| SES-low + G  | 3.3±0.1    | <0.000 <sup>d</sup> | >0.999             | -                   | 0.285               | 0.036 <sup>a</sup>  | >0.999              | 0.067               |
| SES-high     | 2.9±0.1    | 0.162               | 0.814              | 0.285               | -                   | >0.999              | <0.001 <sup>d</sup> | >0.999              |
| SES-high + G | 2.8±0.1    | >0.999              | 0.121 <sup>a</sup> | 0.036 <sup>a</sup>  | >0.999              | -                   | <0.001 <sup>d</sup> | >0.999              |
| NF           | 3.7±0.0    | <0.000 <sup>d</sup> | 0.019 <sup>a</sup> | 0.067               | <0.000 <sup>d</sup> | <0.000 <sup>d</sup> | -                   | <0.000 <sup>d</sup> |
| S            | 2.8±0.1    | 0.632               | 0.216              | 0.067               | >0.999              | >0.999              | <0.000 <sup>d</sup> | -                   |

<sup>a</sup>P<0.05, <sup>b</sup>P<0.01, <sup>c</sup>P≤0.001, <sup>d</sup>P≤0.0001.PI, placebo, SES: superoxidized electrolyzed solution, G: gel,NF: nitrofurazone, S: silver sulfadiazine.

Table SVII. Histology analysis of the collagen orientation with Masson staining.

| A, Day 6     |            |                     |                     |                     |                     |                     |                     |                     |  |
|--------------|------------|---------------------|---------------------|---------------------|---------------------|---------------------|---------------------|---------------------|--|
| Group        | Mean score | PI                  | SES-low             | SES-low + G         | SES-high            | SES-high + G        | NF                  | S                   |  |
| PI           | 2.0±0.0    | -                   | >0.999              | 0.317               | 0.002 <sup>b</sup>  | >0.999              | 0.004 <sup>b</sup>  | >0.999              |  |
| SES-low      | 2.0±0.0    | >0.999              | -                   | 0.317               | 0.002 <sup>b</sup>  | >0.999              | 0.004 <sup>b</sup>  | >0.999              |  |
| SES-low + G  | 2.1±0.1    | 0.317               | 0.317               | -                   | 0.009 <sup>b</sup>  | 0.317               | 0.019 <sup>a</sup>  | 0.317               |  |
| SES-high     | 2.8±0.1    | 0.002 <sup>b</sup>  | 0.002 <sup>b</sup>  | 0.009 <sup>b</sup>  | -                   | 0.002 <sup>b</sup>  | 0.288               | 0.002 <sup>b</sup>  |  |
| SES-high + G | 2.0±0.0    | >0.999              | >0.999              | 0.317               | 0.002 <sup>b</sup>  | -                   | 0.004 <sup>b</sup>  | >0.999              |  |
| NF           | 2.7±0.2    | 0.004 <sup>b</sup>  | 0.004 <sup>b</sup>  | 0.019 <sup>b</sup>  | 0.288               | 0.004 <sup>b</sup>  | -                   | 0.004 <sup>b</sup>  |  |
| S            | 2.0±0.0    | >0.999              | >0.999              | 0.317               | 0.002 <sup>b</sup>  | >0.999              | 0.004 <sup>b</sup>  | -                   |  |
| B, Day 9     |            |                     |                     |                     |                     |                     |                     |                     |  |
| Group        | Mean score | PI                  | SES-low             | SES-low + G         | SES-high            | SES-high + G        | NF                  | S                   |  |
| PI           | 2.0±0.0    | -                   | 0.317               | >0.999              | >0.999              | 0.317               | 0.317               | >0.999              |  |
| SES-low      | 2.1±0.4    | 0.317               | -                   | 0.317               | 0.317               | >0.999              | >0.999              | 0.317               |  |
| SES-low + G  | 2.0±0.0    | >0.999              | 0.317               | -                   | >0.999              | 0.317               | 0.317               | >0.999              |  |
| SES-high     | 2.0±0.0    | >0.999              | 0.317               | >0.999              | -                   | 0.317               | 0.317               | >0.999              |  |
| SES-high + G | 2.1±0.4    | 0.317               | >0.999              | 0.317               | 0.317               | -                   | >0.999              | 0.317               |  |
| NF           | 2.1±0.4    | 0.317               | >0.999              | 0.317               | 0.317               | >0.999              | -                   | 0.317               |  |
| S            | 2.0±0.0    | >0.999              | 0.317               | >0.999              | >0.999              | 0.317               | 0.317               | -                   |  |
| C, Day 18    |            |                     |                     |                     |                     |                     |                     |                     |  |
| Group        | Mean score | PI                  | SES-low             | SES-low + G         | SES-high            | SES-high + G        | NF                  | S                   |  |
| PI           | 2.0±0.0    | -                   | >0.999              | >0.999              | >0.999              | 0.317               | >0.999              | >0.999              |  |
| SES-low      | 2.0±0.0    | >0.999              | -                   | >0.999              | >0.999              | 0.317               | >0.999              | >0.999              |  |
| SES-low + G  | 2.0±0.0    | >0.999              | >0.999              | -                   | >0.999              | 0.317               | >0.999              | >0.999              |  |
| SES-high     | 2.0±0.0    | >0.999              | >0.999              | >0.999              | -                   | 0.317               | >0.999              | >0.999              |  |
| SES-high + G | 2.1±0.4    | 0.317               | 0.317               | 0.317               | 0.317               | -                   | 0.317               | 0.317               |  |
| NF           | 2.0±0.0    | >0.999              | >0.999              | >0.999              | >0.999              | 0.317               | -                   | >0.999              |  |
| S            | 2.0±0.0    | >0.999              | >0.999              | >0.999              | >0.999              | 0.317               | >0.999              | -                   |  |
| D, Day 32    |            |                     |                     |                     |                     |                     |                     |                     |  |
| Group        | Mean score | PI                  | SES-low             | SES-low + G         | SES-high            | SES-high + G        | NF                  | S                   |  |
| PI           | 2.2±0.0    | -                   | 0.000 <sup>c</sup>  | <0.000 <sup>d</sup> | >0.999              | >0.999              | >0.999              | >0.999              |  |
| SES-low      | 3.0±0.0    | 0.000 <sup>c</sup>  | -                   | 0.011 <sup>a</sup>  | <0.000 <sup>d</sup> | 0.066               | <0.000 <sup>d</sup> | <0.000 <sup>d</sup> |  |
| SES-low + G  | 3.6±0.1    | <0.000 <sup>d</sup> | 0.011 <sup>a</sup>  | -                   | <0.000 <sup>d</sup> | <0.000 <sup>d</sup> | <0.000 <sup>d</sup> | <0.000 <sup>d</sup> |  |
| SES-high     | 2.0±0.0    | >0.999              | <0.000 <sup>d</sup> | <0.000 <sup>d</sup> | -                   | 0.066               | >0.999              | >0.999              |  |
| SES-high + G | 2.5±0.0    | >0.999              | 0.066               | <0.000 <sup>d</sup> | 0.066               | -                   | 0.066               | 0.066               |  |
| NF           | 2.0±0.0    | >0.999              | <0.000 <sup>d</sup> | <0.000 <sup>d</sup> | >0.999              | 0.066               | -                   | >0.999              |  |
| S            | 2.0±0.0    | >0.999              | <0.000 <sup>d</sup> | <0.000 <sup>d</sup> | >0.999              | 0.066               | >0.999              | -                   |  |

<sup>a</sup>P<0.05, <sup>b</sup>P<0.01, <sup>c</sup>P≤0.001, <sup>d</sup>P≤0.0001. PI: placebo, SES: superoxidized electrolyzed solution, G: gel, NF: nitrofurazone; S: silver sulfadiazine.

Table SVIII. Histology analysis of mature collagen with Masson staining.

| A, Day 6     |            |                    |                     |                     |                    |                    |                     |                     |
|--------------|------------|--------------------|---------------------|---------------------|--------------------|--------------------|---------------------|---------------------|
| Group        | Mean score | PI                 | SES-low             | SES-low + G         | SES-high           | SES-high + G       | NF                  | S                   |
| Day 6        |            |                    |                     |                     |                    |                    |                     |                     |
| PI           | 2.8±0.2    | -                  | 0.022 <sup>a</sup>  | 0.212               | 0.631              | 0.513              | 0.019 <sup>a</sup>  | 0.181               |
| SES-low      | 2.1±0.2    | 0.022 <sup>a</sup> | -                   | 0.002 <sup>b</sup>  | 0.038 <sup>a</sup> | 0.055              | <0.000 <sup>d</sup> | 0.236               |
| SES-low + G  | 3.2±0.2    | 0.212              | 0.002 <sup>b</sup>  | -                   | 0.619              | 0.060              | 0.222               | 0.017 <sup>a</sup>  |
| SES-high     | 3.0±0.2    | 0.631              | 0.038 <sup>a</sup>  | 0.619               | -                  | 0.050              | 0.021 <sup>a</sup>  | 0.021 <sup>a</sup>  |
| SES-high + G | 2.6±0.2    | 0.513              | 0.055               | 0.060               | 0.050              | -                  | 0.002 <sup>b</sup>  | 0.619               |
| G            |            |                    |                     |                     |                    |                    |                     |                     |
| NF           | 3.6±0.2    | 0.019 <sup>a</sup> | <0.000 <sup>d</sup> | 0.222               | 0.021 <sup>a</sup> | 0.002 <sup>b</sup> | -                   | 0.002 <sup>b</sup>  |
| S            | 2.4±0.2    | 0.181              | 0.236               | 0.017 <sup>a</sup>  | 0.021 <sup>a</sup> | 0.619              | 0.002 <sup>b</sup>  | -                   |
| B, Day 9     |            |                    |                     |                     |                    |                    |                     |                     |
| Group        | Mean score | PI                 | SES-low             | SES-low + G         | SES-high           | SES-high + G       | NF                  | S                   |
| PI           | 1.8±0.2    | -                  | 0.022 <sup>a</sup>  | 0.002 <sup>b</sup>  | 0.008 <sup>b</sup> | 0.282              | 0.304               | 0.107               |
| SES-low      | 1.1±0.1    | 0.022 <sup>a</sup> | -                   | 0.152               | 0.553              | 0.295              | 0.118               | 0.382               |
| SES-low + G  | 1.0±0.0    | 0.002 <sup>b</sup> | 0.152               | -                   | 0.317              | 0.037 <sup>a</sup> | 0.090               | 0.300               |
| SES-high     | 1.1±0.0    | 0.008 <sup>b</sup> | 0.553               | 0.317               | -                  | 0.108              | 0.528               | 0.152               |
| SES-high + G | 1.6±0.0    | 0.282              | 0.295               | 0.037 <sup>a</sup>  | 0.108              | -                  | 0.291               | 0.050               |
| G            |            |                    |                     |                     |                    |                    |                     |                     |
| NF           | 1.3±0.1    | 0.304              | 0.118               | 0.090               | 0.528              | 0.291              | -                   | 0.152               |
| S            | 1.2±0.1    | 0.107              | 0.382               | 0.300               | 0.152              | 0.050              | 0.152               | -                   |
| C, Day 18    |            |                    |                     |                     |                    |                    |                     |                     |
| Group        | Mean score | PI                 | SES-low             | SES-low + G         | SES-high           | SES-high + G       | NF                  | S                   |
| PI           | 1.2±0.1    | -                  | 0.471               | 0.001 <sup>c</sup>  | 0.085              | 0.010 <sup>b</sup> | 0.294               | 0.708               |
| SES-low      | 1.3±0.1    | 0.471              | -                   | 0.005 <sup>b</sup>  | 0.291              | 0.050              | 0.739               | 0.727               |
| SES-low + G  | 2.5±0.3    | 0.001 <sup>c</sup> | 0.005 <sup>b</sup>  | -                   | 0.043 <sup>a</sup> | 0.136              | 0.009 <sup>b</sup>  | 0.003 <sup>b</sup>  |
| SES-high     | 1.6±0.1    | 0.085              | 0.291               | 0.043 <sup>a</sup>  | -                  | 0.708              | 0.528               | 0.291               |
| SES-high + G | 1.7±0.1    | 0.010 <sup>b</sup> | 0.050               | 0.136               | 0.708              | -                  | 0.291               | 0.050               |
| G            |            |                    |                     |                     |                    |                    |                     |                     |
| NF           | 1.4±0.1    | 0.294              | 0.739               | 0.009 <sup>b</sup>  | 0.528              | 0.291              | -                   | 0.471               |
| S            | 1.3±0.1    | 0.708              | 0.727               | 0.003 <sup>b</sup>  | 0.291              | 0.050              | 0.471               | -                   |
| D, Day 32    |            |                    |                     |                     |                    |                    |                     |                     |
| Group        | Mean score | PI                 | SES-low             | SES-low + G         | SES-high           | SES-high + G       | NF                  | S                   |
| PI           | 1.1±0.0    | -                  | 0.002 <sup>b</sup>  | 0.001 <sup>c</sup>  | >0.999             | 0.473              | >0.999              | >0.999              |
| SES-low      | 1.9±0.0    | 0.002 <sup>b</sup> | -                   | >0.999              | 0.231              | 0.926              | 0.049 <sup>a</sup>  | 0.000 <sup>c</sup>  |
| SES-low + G  | 2.0±0.0    | 0.001 <sup>c</sup> | >0.999              | -                   | 0.021 <sup>a</sup> | 0.108              | 0.003 <sup>b</sup>  | <0.000 <sup>d</sup> |
| SES-high     | 1.4±0.2    | >0.999             | 0.231               | 0.021 <sup>a</sup>  | -                  | >0.999             | >0.999              | 0.473               |
| SES-high + G | 1.5±0.2    | 0.473              | 0.926               | 0.108               | >0.999             | -                  | >0.999              | 0.108               |
| G            |            |                    |                     |                     |                    |                    |                     |                     |
| NF           | 1.3±0.1    | >0.999             | 0.049 <sup>a</sup>  | 0.003 <sup>b</sup>  | >0.999             | >0.999             | -                   | >0.999              |
| S            | 1.0±0.0    | >0.999             | 0.000 <sup>c</sup>  | <0.000 <sup>d</sup> | 0.473              | 0.108              | >0.999              | -                   |

<sup>a</sup>P<0.05, <sup>b</sup>P<0.01, <sup>c</sup>P<0.001, <sup>d</sup>P<0.0001. PI: placebo, SES: superoxidized electrolyzed solution, G: gel, NF: nitrofurazone; S: silver sulfadiazine.

Table SIX. Healing score.

| A, Day 6     |            |                    |                    |                    |          |              |        |                    |
|--------------|------------|--------------------|--------------------|--------------------|----------|--------------|--------|--------------------|
| Group        | Mean score | PI                 | SES-low            | SES-low + G        | SES-high | SES-high + G | NF     | S                  |
| PI           | 16.3±0.1   | -                  | >0.999             | >0.999             | >0.999   | >0.999       | 0.544  | >0.999             |
| SES-low      | 16.4±0.1   | >0.999             | -                  | >0.999             | >0.999   | >0.999       | 0.768  | >0.999             |
| SES-low + G  | 17.5±0.1   | >0.999             | >0.999             | -                  | >0.999   | >0.999       | >0.999 | 0.176              |
| SES-high     | 17.4±0.1   | >0.999             | >0.999             | >0.999             | -        | >0.999       | >0.999 | 0.261              |
| SES-high + G | 16.3±0.1   | >0.999             | >0.999             | >0.999             | >0.999   | -            | 0.287  | >0.999             |
| G            |            |                    |                    |                    |          |              |        |                    |
| NF           | 17.8±0.1   | 0.544              | 0.768              | >0.999             | >0.999   | 0.287        | -      | 0.110              |
| S            | 14.6±0.1   | >0.999             | >0.999             | 0.176              | 0.261    | >0.999       | 0.110  | -                  |
| B, Day 9     |            |                    |                    |                    |          |              |        |                    |
| Group        | Mean score | PI                 | SES-low            | SES-low + G        | SES-high | SES-high + G | NF     | S                  |
| PI           | 14.1±0.1   | -                  | >0.999             | >0.999             | >0.999   | >0.999       | >0.999 | 0.500              |
| SES-low      | 14.5±0.2   | >0.999             | -                  | >0.999             | >0.999   | >0.999       | 0.596  | 0.086              |
| SES-low + G  | 14.9±0.0   | >0.999             | >0.999             | -                  | 0.987    | 0.987        | 0.106  | 0.011 <sup>a</sup> |
| SES-high     | 13.5±0.0   | >0.999             | >0.999             | 0.987              | -        | >0.999       | >0.999 | >0.999             |
| SES-high + G | 13.5±0.1   | >0.999             | >0.999             | 0.987              | >0.999   | -            | >0.999 | >0.999             |
| G            |            |                    |                    |                    |          |              |        |                    |
| NF           | 13.3±0.1   | >0.999             | 0.596              | 0.106              | >0.999   | >0.999       | -      | >0.999             |
| S            | 13.0±0.1   | 0.500              | 0.086              | 0.011 <sup>a</sup> | >0.999   | >0.999       | >0.999 | -                  |
| C, Day 18    |            |                    |                    |                    |          |              |        |                    |
| Group        | Mean score | PI                 | SES-low            | SES-low + G        | SES-high | SES-high + G | NF     | S                  |
| PI           | 15.4±0.1   | -                  | 0.500              | 0.011 <sup>a</sup> | >0.999   | 0.086        | >0.999 | >0.999             |
| SES-low      | 17.3±0.0   | 0.500              | -                  | >0.999             | >0.999   | >0.999       | >0.999 | >0.999             |
| SES-low + G  | 18.1±0.1   | 0.011 <sup>a</sup> | >0.999             | -                  | 0.086    | >0.999       | 0.500  | >0.999             |
| SES-high     | 16.7±0.1   | >0.999             | >0.999             | 0.086              | -        | 0.500        | >0.999 | >0.999             |
| SES-high + G | 17.6±0.2   | 0.086              | >0.999             | >0.999             | 0.500    | -            | >0.999 | >0.999             |
| G            |            |                    |                    |                    |          |              |        |                    |
| NF           | 16.8±0.0   | >0.999             | >0.999             | 0.500              | >0.999   | >0.999       | -      | >0.999             |
| S            | 17.1±0.1   | >0.999             | >0.999             | >0.999             | >0.999   | >0.999       | >0.999 | -                  |
| D, Day 32    |            |                    |                    |                    |          |              |        |                    |
| Group        | Mean score | PI                 | SES-low            | SES-low + G        | SES-high | SES-high + G | NF     | S                  |
| PI           | 17.5±0.2   | -                  | 0.013 <sup>a</sup> | 0.002 <sup>b</sup> | >0.999   | >0.999       | >0.999 | >0.999             |
| SES-low      | 20.0±0.2   | 0.013 <sup>a</sup> | -                  | >0.999             | 0.591    | >0.999       | >0.999 | 0.002 <sup>b</sup> |
| SES-low + G  | 20.9±0.4   | 0.002 <sup>b</sup> | >0.999             | -                  | 0.154    | 0.365        | >0.999 | 0.000              |
| SES-high     | 18.3±0.4   | >0.999             | 0.591              | 0.154              | -        | >0.999       | >0.999 | >0.999             |
| SES-high + G | 18.6±0.3   | >0.999             | >0.999             | 0.365              | >0.999   | -            | >0.999 | >0.999             |
| G            |            |                    |                    |                    |          |              |        |                    |
| NF           | 18.9±0.2   | >0.999             | >0.999             | >0.999             | >0.999   | >0.999       | -      | 0.430              |
| S            | 17.1±0.2   | >0.999             | 0.002 <sup>b</sup> | 0.000              | >0.999   | >0.999       | 0.430  | -                  |

<sup>a</sup>P<0.05, <sup>b</sup>P<0.01. PI: placebo, SES: superoxidized electrolyzed solution, G: gel, NF: nitrofurazone; S: silver sulfadiazine.

Table SX. Healing status.

| A, Day 6     |            |                    |                    |                    |          |              |        |                    |
|--------------|------------|--------------------|--------------------|--------------------|----------|--------------|--------|--------------------|
| Group        | Meanscore  | PI                 | SES-low            | SES-low + G        | SES-high | SES-high + G | NF     | S                  |
| PI           | 2.5±0.2    | -                  | >0.999             | >0.999             | >0.999   | >0.999       | >0.999 | >0.999             |
| SES-low      | 2.7±0.1    | >0.999             | -                  | >0.999             | >0.999   | >0.999       | >0.999 | >0.999             |
| SES-low + G  | 2.8±0.1    | >0.999             | >0.999             | -                  | >0.999   | >0.999       | >0.999 | >0.999             |
| SES-high     | 2.8±0.1    | >0.999             | >0.999             | >0.999             | -        | >0.999       | >0.999 | >0.999             |
| SES-high + G | 2.7±0.1    | >0.999             | >0.999             | >0.999             | >0.999   | -            | >0.999 | >0.999             |
| NF           | 2.8±0.1    | >0.999             | >0.999             | >0.999             | >0.999   | >0.999       | -      | >0.999             |
| S            | 2.3±0.2    | >0.999             | >0.999             | >0.999             | >0.999   | >0.999       | >0.999 | -                  |
| B, Day 9     |            |                    |                    |                    |          |              |        |                    |
| Group        | Mean score | PI                 | SES-low            | SES-low + G        | SES-high | SES-high + G | NF     | S                  |
| PI           | 2.2±0.2    | -                  | >0.999             | >0.999             | >0.999   | >0.999       | >0.999 | >0.999             |
| SES-low      | 2.7±0.2    | >0.999             | -                  | >0.999             | >0.999   | >0.999       | >0.999 | >0.999             |
| SES-low + G  | 2.3±0.29   | >0.999             | >0.999             | -                  | >0.999   | >0.999       | >0.999 | >0.999             |
| SES-high     | 2.2±0.2    | >0.999             | >0.999             | >0.999             | -        | >0.999       | >0.999 | >0.999             |
| SES-high + G | 2.3±0.2    | >0.999             | >0.999             | >0.999             | >0.999   | -            | >0.999 | >0.999             |
| NF           | 2.3±0.2    | >0.999             | >0.999             | >0.999             | >0.999   | >0.999       | -      | >0.999             |
| S            | 2.2±0.2    | >0.999             | >0.999             | >0.999             | >0.999   | >0.999       | >0.999 | -                  |
| C, Day 18    |            |                    |                    |                    |          |              |        |                    |
| Group        | Mean score | PI                 | SES-low            | SES-low + G        | SES-high | SES-high + G | NF     | S                  |
| PI           | 2.5±0.2    | -                  | >0.999             | >0.999             | >0.999   | >0.999       | >0.999 | >0.999             |
| SES-low      | 2.5±0.2    | >0.999             | -                  | >0.999             | >0.999   | >0.999       | >0.999 | >0.999             |
| SES-low + G  | 2.8±0.12   | >0.999             | >0.999             | -                  | >0.999   | >0.999       | >0.999 | >0.999             |
| SES-high     | 2.7±0.1    | >0.999             | >0.999             | >0.999             | -        | >0.999       | >0.999 | >0.999             |
| SES-high + G | 2.8±0.12   | >0.999             | >0.999             | >0.999             | >0.999   | -            | >0.999 | >0.999             |
| NF           | 2.5±0.2    | >0.999             | >0.999             | >0.999             | >0.999   | >0.999       | -      | >0.999             |
| S            | 2.5±0.2    | >0.999             | >0.999             | >0.999             | >0.999   | >0.999       | >0.999 | -                  |
| D, Day 32    |            |                    |                    |                    |          |              |        |                    |
| Group        | Mean score | PI                 | SES-low            | SES-low + G        | SES-high | SES-high + G | NF     | S                  |
| PI           | 2.1±0.1    | -                  | 0.008 <sup>b</sup> | 0.003 <sup>b</sup> | >0.999   | >0.999       | >0.999 | >0.999             |
| SES-low      | 2.8±0.1    | 0.008 <sup>b</sup> | -                  | >0.999             | 0.255    | >0.999       | >0.999 | 0.056              |
| SES-low + G  | 2.9±0.1    | 0.003 <sup>b</sup> | >0.999             | -                  | 0.107    | 0.532        | >0.999 | 0.021 <sup>a</sup> |
| SES-high     | 2.3±0.1    | >0.999             | 0.255              | 0.107              | -        | >0.999       | >0.999 | >0.999             |
| SES-high + G | 2.4±0.1    | >0.999             | >0.999             | 0.532              | >0.999   | -            | >0.999 | >0.999             |
| NF           | 2.5±0.1    | >0.999             | >0.999             | >0.999             | >0.999   | >0.999       | -      | >0.999             |
| S            | 2.2±0.1    | >0.999             | 0.056              | 0.021 <sup>a</sup> | >0.999   | >0.999       | >0.999 | -                  |

<sup>a</sup>P<0.05, <sup>b</sup>P<0.01. PI, placebo; SES: superoxidized electrolyzed solution; G: gel; NF: nitrofurazone; S: silver sulfadiazine.
